# Supplementary material
Source: publisher figshare collection journal article supplement (https://acs.figshare.com/ndownloader/files/5353384)
Supplement: Supplementary file 1 [file 5353384]

## Supporting Information

Stepwise Synthesis of Bis-Alkynyl Co<sup>III</sup>(cyclam) Complexes under Ambient Conditions

Sean N. Natoli, Matthias Zeller and Tong Ren\*

## Contents

|                                  |     |
|----------------------------------|-----|
| 1. Experimental detail           | S3  |
| 2. IR and UV-Vis spectra         | S6  |
| 3. ES-MS of Reaction of <b>4</b> | S10 |
| 4. Crystal Data                  | S11 |
| 5. Electrochemistry              | S18 |
| 6. Computational Details         | S19 |

## **Experimental Details**

**General Experimental.** All reagents were used as received. (Pentafluorophenyl)acetylene was synthesized using literature procedures.<sup>1</sup> UV-vis spectra were obtained with a Jasco V-670 spectrophotometer. FT-IR spectra were measured on a Jasco FT/IR-6300 as neat samples. <sup>1</sup>H-NMR spectra were obtained using a Varian Mercury 300 NMR, with chemical shifts ( $\delta$ ) referenced to the residual solvent signal (CH<sub>3</sub>CN at 1.93 ppm). Voltammograms were recorded on a CHI620A voltammetric analyzer with a glassy carbon working electrode (diameter = 2 mm), a Pt-wire auxiliary electrode and a Ag/AgNO<sub>3</sub> reference electrode filled with 10 mM AgNO<sub>3</sub> and 0.1 M Bu<sub>4</sub>NPF<sub>6</sub> in dry MeCN or DCM. The concentration of analyte was always 1.0 mM in 4 mL dry MeCN or DCM (thoroughly degassed by Ar purging). Potentials were corrected using an internal ferrocene standard at the end of runs.

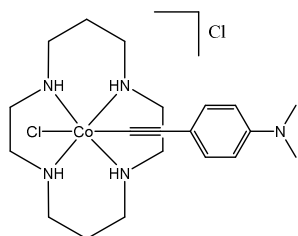

**Preparation of [Co(cyclam)(C<sub>2</sub>C<sub>6</sub>H<sub>4</sub>NMe<sub>2</sub>)Cl]Cl (**1**):** In a round bottom flask 350 mg (0.96 mmol) of [Co(cyclam)Cl<sub>2</sub>]Cl<sup>2</sup> was dissolved in 70 ml of MeOH. To the solution was added 1 ml (7 mmol) of Et<sub>3</sub>N and 153 mg (1.05 mmol) of HC<sub>2</sub>C<sub>6</sub>H<sub>4</sub>NMe<sub>2</sub>. The solution was refluxed for 24h, and a gradual shift in color from green to red was observed. Solvent was removed and purification was performed on a silica gel pad, rinsing first with EtOAc, and then eluting **1** with an EtOAc/MeOH (5:1) mixture. Complex **1** was then recrystallized by the addition of Et<sub>2</sub>O to a concentrated solution in MeOH yielding a red crystalline material. Crystals suitable for single crystal X-ray diffraction were obtained from the slow diffusion of Et<sub>2</sub>O into a concentrated

solution in MeOH. Yield: 335 mg (0.71 mmol) (74% based on [Co(cyclam)Cl<sub>2</sub>]Cl) Data for **1**: ESI-MS (MeOH): 438-[Co(cyclam)(C<sub>2</sub>C<sub>6</sub>H<sub>4</sub>NMe<sub>2</sub>)Cl]<sup>+</sup>. Elem. Anal. Found (calcd) for C<sub>20</sub>H<sub>34</sub>N<sub>5</sub>CoCl<sub>2</sub> (**1** · H<sub>2</sub>O): C, 48.31 (48.79); H, 7.67 (7.31); N, 13.07 (14.22). IR(cm<sup>-1</sup>): Co-C≡C- 2113 (s). Electrochemistry (E<sub>1/2</sub> or E<sub>p,a</sub> or E<sub>p,c</sub>, V; ΔE<sub>p</sub>, V; i<sub>backward</sub>/i<sub>forward</sub>): A, 0.64, 0.0, 0.0; B, 0.26, 0.072, 0.56; C, -1.62, 0.0, 0.0; D, -2.021, 0.0, 0.0. <sup>1</sup>H NMR (CD<sub>3</sub>CN, δ): 7.29 (d, *J* = 9.0 Hz, 2H, Ar-*H*), 6.66 (d, *J* = 9.3 Hz, 2H, Ar-*H*), 4.56 (br s, 2H, N-*H*), 4.48 (br s, 2H, N-*H*), 2.92 (s, 6H, N-CH<sub>3</sub>), 2.90-2.39 (m, 16H, CH<sub>2</sub>), 1.90 (t, 2H, CH<sub>2</sub>), 1.49 (q, 2H, CH<sub>2</sub>). Absorption spectrum (MeCN): λ<sub>max</sub> (ε<sub>max</sub>, Lmol<sup>-1</sup>cm<sup>-1</sup>): 510 (403), 395 (892).

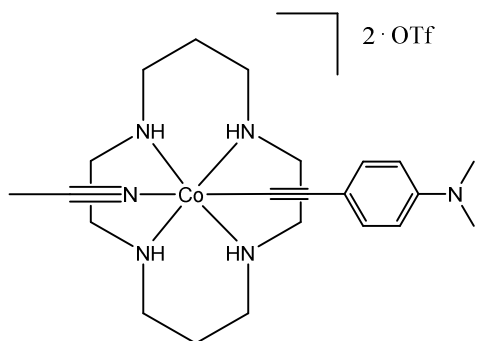

**Preparation of [Co(cyclam)(C<sub>2</sub>C<sub>6</sub>H<sub>4</sub>NMe<sub>2</sub>)NCMe](OTf)<sub>2</sub> (**2**):** In a round bottom flask 300 mg (0.63 mmol) of **1** was dissolved in 50 ml of MeCN. To the solution was added 490 mg (1.91 mmol) of AgOTf. The solution was refluxed for 48h. Solvent was removed and purification was performed on a silica gel pad by first rinsing with EtOAc, and then eluting **2** with MeCN. Complex **2** was then recrystallized by the addition of Et<sub>2</sub>O/EtOAc (1:1 v/v) to a concentrated solution in MeCN yielding a red-orange crystalline material. Crystals suitable for single crystal X-ray diffraction were obtained from the slow diffusion of Et<sub>2</sub>O into a concentrated solution of MeCN. Yield: 310 mg (0.42 mmol) (66% based on Co of **1**) Data for **2**: ESI-MS (MeCN): 552-[Co(cyclam)(OTf)(C<sub>2</sub>C<sub>6</sub>H<sub>4</sub>NMe<sub>2</sub>)]<sup>+</sup>. Elem. Anal. Found (calcd) for C<sub>24</sub>H<sub>39</sub>N<sub>6</sub>O<sub>7</sub>CoF<sub>6</sub>S<sub>2</sub> (**2** · H<sub>2</sub>O): C, 37.72 (37.90); H, 4.88 (5.17); N, 10.84 (11.09). IR(cm<sup>-1</sup>): (Co-C≡C-) 2128. Electrochemistry

( $E_{1/2}$  or  $E_{p,a}$  or  $E_{p,c}$ , V;  $\Delta E_p$ , V;  $i_{\text{backward}}/i_{\text{forward}}$ ): A, 1.22, 0.0, 0.0; B, 0.31, 0.074, 0.87; C, -1.39, 0.0, 0.0; D, -2.0, 0.0, 0.0.  $^1\text{H}$  NMR ( $\text{CD}_3\text{CN}$ ,  $\delta$ ): 7.05 (d,  $J = 8.4$  Hz, 2H, Ar- $H$ ), 6.42 (d,  $J = 7.8$  Hz, 2H, Ar- $H$ ), 4.48 (br s, 2H, N- $H$ ), 4.36 (br s, 2H, N- $H$ ), 2.66 (s, 6H, N- $\text{CH}_3$ ), 2.58-2.12 (m, 16H,  $\text{CH}_2$ ), 1.71 (t, 2H,  $\text{CH}_2$ ), 1.35 (q, 2H,  $\text{CH}_2$ ). Absorption spectrum (MeCN):  $\lambda_{\text{max}}$  ( $\epsilon_{\text{max}}$ ,  $\text{Lmol}^{-1}\text{cm}^{-1}$ ) 489 (252), 379 (338).

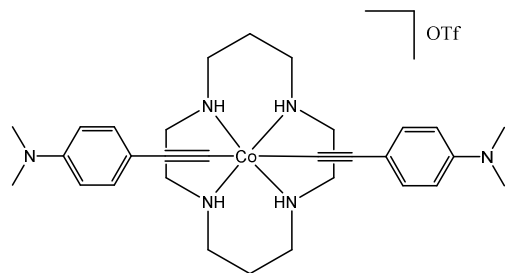

**Preparation of  $[\text{Co}(\text{cyclam})(\text{C}_2\text{C}_6\text{H}_4\text{NMe}_2)_2]\text{OTf}$  (**3**):** In a round bottom flask 100 mg (0.13 mmol) of **2** was dissolved in 50 ml of MeCN. To the solution was added 1 ml (7 mmol) of  $\text{Et}_3\text{N}$  and 85 mg (0.58 mmol) of  $\text{HC}_2\text{C}_6\text{H}_4\text{NMe}_2$ . The solution was refluxed for 24h, and a gradual shift in color from red to yellow was observed. Solvent was removed and purification was performed on a silica gel pad by first rinsing with EtOAc, and then eluting **3** with an EtOAc/MeOH (9:1) mixture. Complex **3** was then recrystallized by the addition of pentane to a concentrated solution in methylene chloride yielding a yellow crystalline material. Crystals suitable for single crystal X-ray diffraction were obtained from the slow diffusion of  $\text{Et}_2\text{O}$  into a concentrated solution of  $\text{CD}_3\text{CN}$ . Yield: 41 mg (0.06 mmol) (44% based on **2**) Data for **3**: ESI-MS (MeCN): 547- $[\text{Co}(\text{cyclam})(\text{C}_2\text{C}_6\text{H}_4\text{NMe}_2)_2]^+$ . Elem. Anal. Found (calcd) for  $\text{C}_{31}\text{H}_{44}\text{N}_6\text{CoF}_3\text{O}_3\text{S}$  (**3** ·  $\text{H}_2\text{O}$ ): C, 52.61 (52.09); H, 6.49 (6.49); N, 11.99 (11.76). IR( $\text{cm}^{-1}$ ): (Co-C $\equiv$ C-) 2100. Electrochemistry ( $E_{1/2}$  or  $E_{p,a}$  or  $E_{p,c}$ , V;  $\Delta E_p$ , V;  $i_{\text{backward}}/i_{\text{forward}}$ ): A, 0.92, 0.0, 0.0; B, 0.23, 0.186, 0.90; C, -2.08, 0.0, 0.0.  $^1\text{H}$  NMR ( $\text{CD}_3\text{CN}$ ,  $\delta$ ): 7.06 (d,  $J = 8.7$  Hz, 4H, Ar- $H$ ), 6.43 (d,  $J = 9.0$  Hz, 4H, Ar- $H$ ),

3.87 (br s, 4H, N-*H*), 2.67 (s, 12H, N-CH<sub>3</sub>), 2.62-2.12 (m, 16H, CH<sub>2</sub>), 1.66 (t, 2H, CH<sub>2</sub>), 1.05 (q, 2H, CH<sub>2</sub>). Absorption spectrum (MeCN):  $\lambda_{\text{max}}$  ( $\epsilon_{\text{max}}$ , Lmol<sup>-1</sup>cm<sup>-1</sup>) 470 (180), 328 (10155).

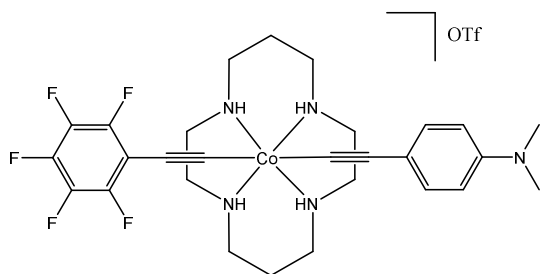

**Preparation of [Co(cyclam)(C<sub>2</sub>C<sub>6</sub>H<sub>4</sub>NMe<sub>2</sub>)(C<sub>2</sub>C<sub>6</sub>F<sub>5</sub>)]OTf (**4**):** In a round bottom flask 100 mg (0.13 mmol) of **2** was dissolved in 50 ml of MeCN. To the solution was added 1 mL (7 mmol) of Et<sub>3</sub>N and 110 mg (0.58 mmol) of HC<sub>2</sub>C<sub>6</sub>F<sub>5</sub>. The solution was refluxed for 24h, and a gradual shift in color from red to yellow was observed. Solvent was removed and purification was performed on a silica gel pad by first rinsing with EtOAc, and then eluting **4** with an EtOAc/MeOH (7:1) mixture. Complex **4** was then recrystallized by the addition of pentane to a concentrated solution in methylene chloride yielding a yellow crystalline material. Crystals suitable for single crystal X-ray diffraction were obtained from the slow diffusion of hexane into a concentrated solution of methylene chloride. Yield: 47 mg (0.06 mmol) (47% based on **2**) Data for **4**: ESI-MS (MeOH): 594-[Co(cyclam)(C<sub>2</sub>C<sub>6</sub>F<sub>5</sub>)(C<sub>2</sub>C<sub>6</sub>H<sub>4</sub>NMe<sub>2</sub>)]<sup>+</sup>. Elem. Anal. Found (calcd) for C<sub>29</sub>H<sub>34</sub>N<sub>5</sub>CoF<sub>8</sub>O<sub>3</sub>S (**4** · 2H<sub>2</sub>O): C, 44.50 (44.68); H, 4.48 (4.91); N, 8.78 (8.98). IR(cm<sup>-1</sup>): (Co-C≡C-C<sub>6</sub>F<sub>5</sub>) 2115, (Co-C≡C-C<sub>6</sub>H<sub>4</sub>N(CH<sub>3</sub>)<sub>2</sub>) 2094. Electrochemistry (E<sub>1/2</sub> or E<sub>p,a</sub> or E<sub>p,c</sub>, V; ΔE<sub>p</sub>, V; i<sub>backward</sub>/i<sub>forward</sub>): A, 1.05, 0.0, 0.0; B, 0.23, 0.126, 0.93; C, -1.86, 0.134, 0.59. <sup>1</sup>H NMR (CD<sub>3</sub>CN, δ): 7.11 (d, *J* = 8.7 Hz, 2H, Ar-*H*), 6.47 (d, *J* = 8.7 Hz, 2H, Ar-*H*), 4.02 (br s, 2H, N-*H*), 3.83 (br s, 2H, N-*H*), 2.69 (s, 6H, N-CH<sub>3</sub>), 2.63-2.13 (m, 16H, CH<sub>2</sub>), 1.65 (t, 2H, CH<sub>2</sub>), 1.12 (q, 2H, CH<sub>2</sub>). Absorption spectrum (MeCN):  $\lambda_{\text{max}}$  ( $\epsilon_{\text{max}}$ , Lmol<sup>-1</sup>cm<sup>-1</sup>) 460 (183), 369 (703).

## IR and UV-vis spectra

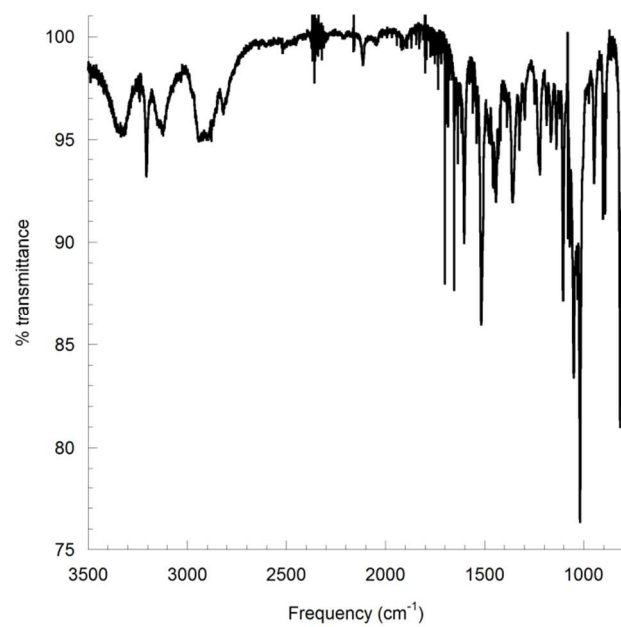

**Figure S1.** IR absorption spectrum of **1**.

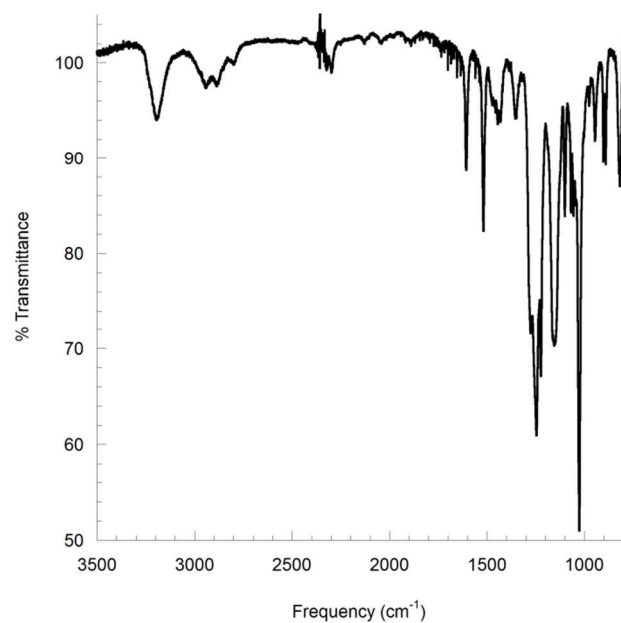

**Figure S2.** IR absorption spectrum of **2**.

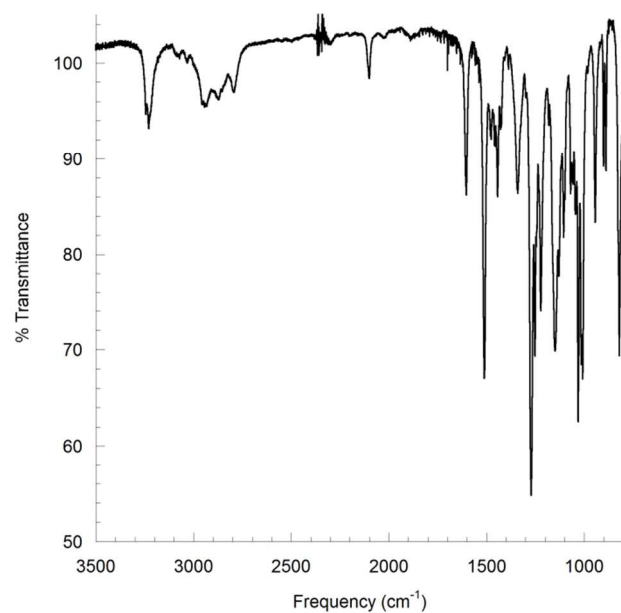

**Figure S3.** IR absorption spectrum of **3**.

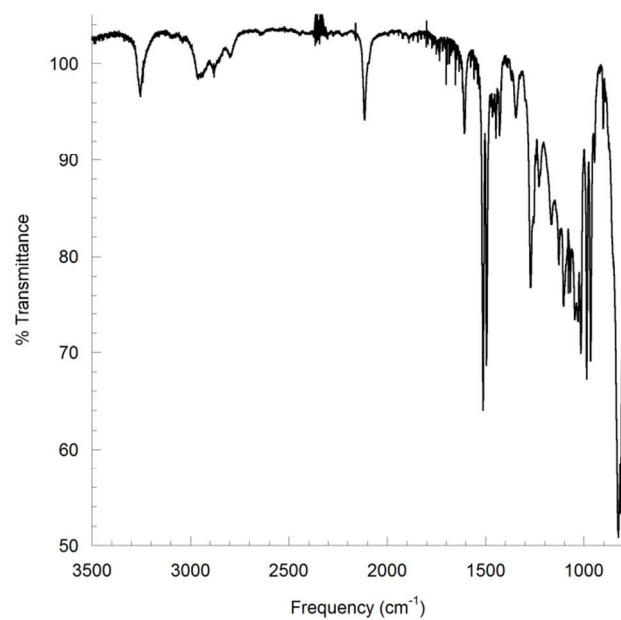

**Figure S4.** IR absorption spectrum of **4**.



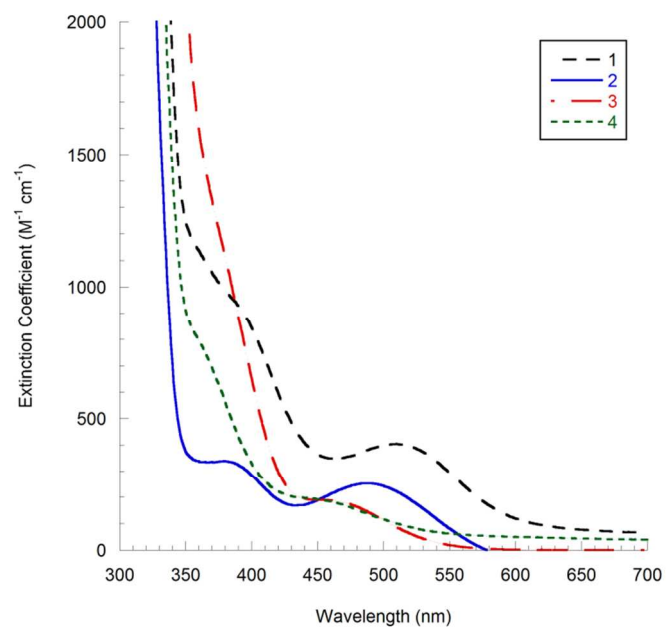

**Figure S5.** UV-vis absorption spectra of **1-4** in acetonitrile.

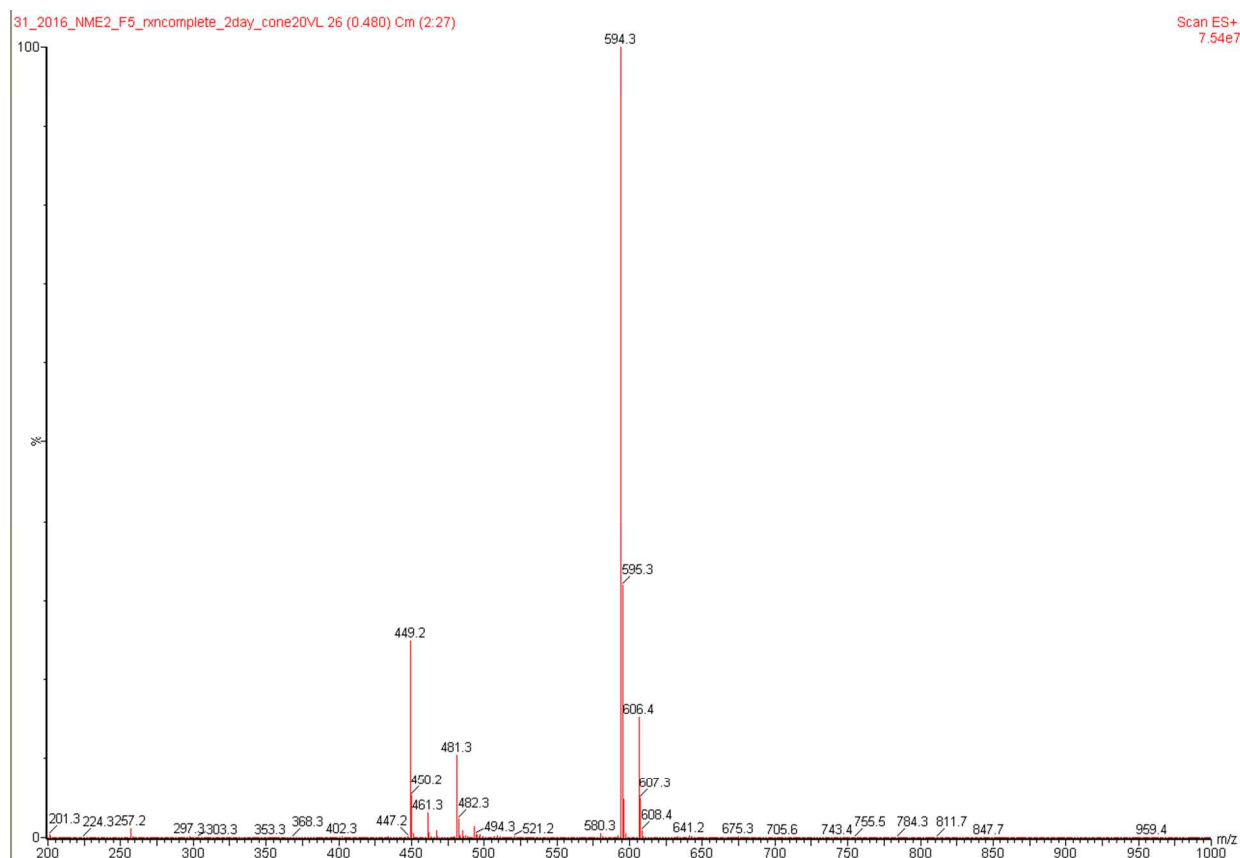

**Figure S6.** MS data for the reaction mixture of **4** after 24h shows no observable scrambling of acetylides as is the case of lithium reagents. No peaks corresponding to **3** ( $m/z = 547$ ) or *trans*-[Co(cyclam)(C<sub>2</sub>C<sub>6</sub>F<sub>5</sub>)<sub>2</sub>]<sup>+</sup> (calculated to be at  $m/z = 641$ ) are present.

## Crystal structures

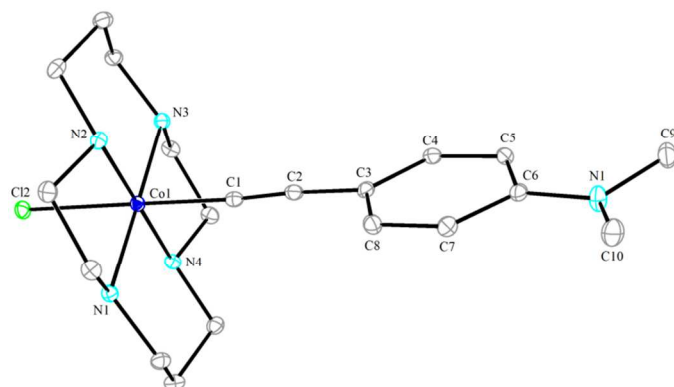

**Figure S7.** ORTEP plot of  $1^+$  at 30% probability level. Hydrogen atoms are omitted for clarity. Selected bond lengths (Å) and angles (deg): Co1-N<sub>av</sub>, 1.979[2]; Co1-Cl2, 2.3177(4); Co1-C1, 1.890(2); C1-C2, 1.201(2); C2-C3, 1.444(2); C6-N1, 1.376(2); Cl1-Co1-C1, 178.42(4); C2-C1-Co1, 172.3(2); C1-C2-C3, 174.2(2); C6-N1-C9, 121.3(2).

## Crystallographic Details:

**General Procedures.** X-ray diffraction data for **1-4** were collected using a Nonius Kappa CCD diffractometer with Mo-K $\alpha$  radiation ( $\lambda = 0.71073$  Å), or a Rigaku Rapid II curved image plate diffractometer with Cu-K $\alpha$  ( $\lambda = 1.54178$  Å). The Nonius Kappa CCD instrument features a fine focus sealed tube X-ray source with graphite monochromator. The Rigaku Rapid II diffractometer is equipped with an X-ray microsources with a laterally graded multilayers (Goebel) mirror for monochromatization. Single crystals were mounted on Mitegen micromesh or loop mounts using a trace of mineral oil and cooled in-situ to 100(2) K for data collection. Data on the Kappa CCD diffractometer were collected using the Nonius Collect software<sup>4</sup>. Data obtained from the Rigaku Rapid II instrument were collected using the dtrek option of CrystalClear.<sup>5</sup> and processed using HKL3000<sup>5</sup>. Both kinds of data sets were processed using HKL3000<sup>6</sup> and data were corrected for absorption and scaled using Scalepack<sup>6</sup>. The space groups were assigned and the structures were solved by direct methods using XPREP within the SHELXTL suite of programs<sup>7</sup> and refined by full matrix least squares against  $F^2$  with all

reflections using Shelxl2013 or 2014<sup>8</sup> using the graphical interface Shelxle<sup>9</sup>. If not specified otherwise H atoms attached to carbon and nitrogen atoms and hydroxyl hydrogens were positioned geometrically and constrained to ride on their parent atoms, with carbon hydrogen bond distances of 0.95 Å for and aromatic C-H, 1.00, and 0.98 Å for aliphatic C-H and CH<sub>3</sub> moieties, respectively. Methyl H atoms were allowed to rotate but not to tip to best fit the experimental electron density.  $U_{\text{iso}}(\text{H})$  values were set to a multiple of  $U_{\text{eq}}(\text{C})$  with 1.5 for CH<sub>3</sub>, and 1.2 for C-H units, respectively. Non merohedric twinning was handled using the programs Rotax<sup>10</sup> and WinGX<sup>11</sup>.

In compound **2** one of the two triflate anions is disordered over one major and two minor orientations. The three moieties were restrained to have similar geometries, and  $U^{\text{ij}}$  components of ADPs were restrained to be similar for atoms closer than 1.7 Å. Subject to these conditions the occupancy rates refined to 0.817(2), 0.058(2) and 0.1249(18).

In compound **3** the crystal under investigation was found to be slightly twinned by non-merohedry. Programs compatible with the Nonius KappaCCD diffractometer and HKL3000 lack the ability to simultaneously integrate more than one twin domain. With no data set obtainable through simultaneous integration of both twin domains, the data were instead handled as if not twinned, with only the major domain integrated, and converted into an hklf 5 type format hkl file after integration using the "Make HKLF5 File" routine as implemented in WinGX. The twin law and matrix were obtained using the program ROTAX as implemented in WinGX. The twin operation was identified as a 180 degree rotation around 1 0 0 in the reciprocal lattice direction, the twin matrix as 1 0.591 0.293, 0 -1 0, 0 0 -1. The Overlap R1 and R2 values in the "Make HKLF5 File" routine used were 0.18, i.e. reflections with a discriminator function less or equal to overlap radius of 0.18 were counted as overlapped, all others as single. The discriminator function used was the "delta function on index non-integrality". No reflections were omitted.

The structure was solved using direct methods with all reflections of component 1. The structure was refined using the hklf 5 routine with all reflections of component 1 (including the overlapping ones) as obtained from WinGX, resulting in a BASF value of 0.0607(9). No  $R_{\text{int}}$  value is obtainable for the hklf 5 type file using the WinGX routine.

Disorder is observed in the structure, affecting the triflate anions, the solvate ether and acetonitrile molecules, as well as one of the dimethyl amine substituents of one of the four crystallographically independent cations. The two triflate cations are disordered by rotation. The molecule of S1A was refined as disordered over two orientations. That of S1B as disordered over three orientations. All five triflate moieties were restrained to have similar geometries (SAME command in Skelxl).  $U^{ij}$  components of ADPs of atoms at each site were restrained to be similar if closer than 1.7 Å. Subject to these conditions the occupancy rates refined to 0.667(9) and 0.333(9) for the moieties of S1A and S1C, and to 0.513(4), 0.364(3) and 0.122(2) for the moieties of S1B, S1D and S1E. One of the dimethyl amine substituents was refined as disordered by inversion at the nitrogen. The two moieties were restrained to have similar geometries, and  $U^{ij}$  components of ADPs were restrained to be similar if closer than 1.7 Å. Subject to these conditions the occupancy rates refined to 0.55(3) and 0.45(3).

Solvate acetonitrile and ether molecules are extensively disordered, with one site occupied by mostly acetonitrile, and a neighboring site by mostly ether. The latter site is in close proximity to an inversion center, and part of the disordered ether molecules are incompatible with their own symmetry equivalent counterparts. Due to the extensive disorder and overlap of neighboring disordered molecules no attempts were made to ensure exact full occupancy for each site. All ether molecules and all acetonitrile molecules were each restrained to have similar geometries. For the acetonitrile molecules the N-C triple bond length was restrained to approximately 1.15(2) Angstrom, the 1,3 N...C distance to at least 2.50(2) Å.  $U^{ij}$  components of ADPs were restrained to be similar if closer than 1.7 Å. Subject to these conditions the occupancy rates refined to 0.396(7), 0.220(6) and 0.076(6) for the three ether molecule moieties, and to 0.400(14), 0.299(14), 0.150(8) and 0.184(10) for the four acetonitrile moieties. The fourth of these moieties does overlap mostly with the ether molecules, the other three take up the other solvate occupied site.

**TableS1. Experimental details**

|                                                                            | 1                                                                                       | 2                                                                               |
|----------------------------------------------------------------------------|-----------------------------------------------------------------------------------------|---------------------------------------------------------------------------------|
| Crystal data                                                               |                                                                                         |                                                                                 |
| Chemical formula                                                           | $\text{C}_{20}\text{H}_{34}\text{ClCoN}_5 \cdot 2(\text{CH}_4\text{O}) \cdot \text{Cl}$ | $\text{C}_{22}\text{H}_{37}\text{CoN}_6 \cdot 2(\text{CF}_3\text{O}_3\text{S})$ |
| $M_r$                                                                      | 538.43                                                                                  | 742.64                                                                          |
| Temperature (K)                                                            | 100                                                                                     | 100                                                                             |
| Crystal system, space group                                                | Monoclinic, $P2_1/n$                                                                    | Monoclinic, $P2_1/n$                                                            |
| $a, b, c$ (Å)                                                              | 10.3649 (2), 19.2578 (5), 12.8446 (3)                                                   | 9.2529 (1), 23.1380 (3), 15.0659 (2)                                            |
| $\alpha, \beta, \gamma$ (°)                                                | 90, 97.7118 (19), 90                                                                    | 90, 95.7595 (5), 90                                                             |
| $V$ (Å <sup>3</sup> )                                                      | 2540.66 (10)                                                                            | 3209.23 (7)                                                                     |
| $Z$                                                                        | 4                                                                                       | 4                                                                               |
| $F(000)$                                                                   | 1144                                                                                    | 1536                                                                            |
| $D_x$ (Mg m <sup>-3</sup> )                                                | 1.408                                                                                   | 1.537                                                                           |
| Radiation type                                                             | Mo $K\alpha$                                                                            | Mo $K\alpha$                                                                    |
| No. of reflections for cell measurement                                    | 25671                                                                                   | 83733                                                                           |
| $\theta$ range (°) for cell measurement                                    | 1.9–30.5                                                                                | 2.4–30.0                                                                        |
| $\mu$ (mm <sup>-1</sup> )                                                  | 0.91                                                                                    | 0.75                                                                            |
| Crystal shape                                                              | Rod                                                                                     | Rod                                                                             |
| Colour                                                                     | Red                                                                                     | Red                                                                             |
| Crystal size (mm)                                                          | $0.35 \times 0.19 \times 0.18$                                                          | $0.55 \times 0.20 \times 0.11$                                                  |
| Data collection                                                            |                                                                                         |                                                                                 |
| Diffractometer                                                             | Nonius Kappa CCD diffractometer                                                         | Nonius Kappa CCD diffractometer                                                 |
| Radiation source                                                           | fine focus X-ray tube                                                                   | fine focus X-ray tube                                                           |
| Monochromator                                                              | Graphite                                                                                | Graphite                                                                        |
| Scan method                                                                | $\omega$ and $\phi$ scans                                                               | $\omega$ and $\phi$ scans                                                       |
| Absorption correction                                                      | multi-scan, <i>SCALEPACK</i> (Otwinowski & Minor, 1997)                                 | multi-scan, <i>SCALEPACK</i> (Otwinowski & Minor, 1997)                         |
| $T_{\min}, T_{\max}$                                                       | 0.697, 0.853                                                                            | 0.693, 0.922                                                                    |
| No. of measured, independent and observed [ $I > 2\sigma(I)$ ] reflections | 25661, 6771, 5288                                                                       | 83733, 8632, 6980                                                               |
| $R_{\text{int}}$                                                           | 0.051                                                                                   | 0.039                                                                           |
| $\theta$ values (°)                                                        | $\theta_{\max} = 30.5, \theta_{\min} = 1.9$                                             | $\theta_{\max} = 30.0, \theta_{\min} = 2.4$                                     |
| $(\sin \theta/\lambda)_{\max}$ (Å <sup>-1</sup> )                          | 0.714                                                                                   | 0.704                                                                           |
| Range of $h, k, l$                                                         | $h = -11 \rightarrow 13, k = -23 \rightarrow 26, l = -13 \rightarrow 16$                | $h = -12 \rightarrow 12, k = -31 \rightarrow 31, l = -20 \rightarrow 19$        |
| Refinement                                                                 |                                                                                         |                                                                                 |

|                                                             |                                                                                  |                                                                                 |
|-------------------------------------------------------------|----------------------------------------------------------------------------------|---------------------------------------------------------------------------------|
| $R[F^2 > 2\sigma(F^2)], wR(F^2), S$                         | 0.031, 0.076, 1.06                                                               | 0.033, 0.087, 1.05                                                              |
| No. of reflections                                          | 6771                                                                             | 8632                                                                            |
| No. of parameters                                           | 296                                                                              | 557                                                                             |
| No. of restraints                                           | 0                                                                                | 1123                                                                            |
|                                                             | $w = 1/[\sigma^2(F_o^2) + (0.0341P)^2 + 0.2295P]$ where $P = (F_o^2 + 2F_c^2)/3$ | $w = 1/[\sigma^2(F_o^2) + (0.0405P)^2 + 1.607P]$ where $P = (F_o^2 + 2F_c^2)/3$ |
| H-atom treatment                                            | H-atom parameters were constrained                                               | H-atom parameters were constrained                                              |
| $(\Delta/\sigma)_{\max}$                                    | 0.002                                                                            | 0.001                                                                           |
| $\Delta\rho_{\max}, \Delta\rho_{\min}$ (e Å <sup>-3</sup> ) | 0.46, -0.45                                                                      | 0.41, -0.53                                                                     |

|                                                                            | 3                                                                                                                                                               | 4                                                                                    |
|----------------------------------------------------------------------------|-----------------------------------------------------------------------------------------------------------------------------------------------------------------|--------------------------------------------------------------------------------------|
| Crystal data                                                               |                                                                                                                                                                 |                                                                                      |
| Chemical formula                                                           | $\text{C}_{30}\text{H}_{44}\text{CoN}_6\cdot\text{CF}_3\text{O}_3\text{S}\cdot 0.346(\text{C}_4\text{H}_{10}\text{O})\cdot 0.516(\text{C}_2\text{H}_3\text{N})$ | $\text{C}_{28}\text{H}_{34}\text{CoF}_5\text{N}_5\cdot\text{CF}_3\text{O}_3\text{S}$ |
| $M_r$                                                                      | 743.49                                                                                                                                                          | 743.60                                                                               |
| Temperature (K)                                                            | 100                                                                                                                                                             | 100                                                                                  |
| Crystal system, space group                                                | Triclinic, $P\bar{1}$                                                                                                                                           | Orthorhombic, $Pbca$                                                                 |
| $a, b, c$ (Å)                                                              | 13.6550 (3), 16.9720 (3), 17.1983 (5)                                                                                                                           | 22.9383 (13), 12.1841 (8), 23.0305 (18)                                              |
| $\alpha, \beta, \gamma$ (°)                                                | 93.6056 (8), 99.2916 (8), 110.8429 (9)                                                                                                                          | 90, 90, 90                                                                           |
| $V$ (Å <sup>3</sup> )                                                      | 3644.62 (15)                                                                                                                                                    | 6436.6 (8)                                                                           |
| $Z$                                                                        | 4                                                                                                                                                               | 8                                                                                    |
| $F(000)$                                                                   | 1567.4                                                                                                                                                          | 3056                                                                                 |
| $D_x$ (Mg m <sup>-3</sup> )                                                | 1.355                                                                                                                                                           | 1.535                                                                                |
| Radiation type                                                             | Mo $K\alpha$                                                                                                                                                    | Cu $K\alpha$                                                                         |
| No. of reflections for cell measurement                                    | 37807                                                                                                                                                           | 50866                                                                                |
| $\theta$ range (°) for cell measurement                                    | 1.8–28.3                                                                                                                                                        | 5.3–72.8                                                                             |
| $\mu$ (mm <sup>-1</sup> )                                                  | 0.59                                                                                                                                                            | 5.56                                                                                 |
| Crystal shape                                                              | Plate                                                                                                                                                           | Plate                                                                                |
| Colour                                                                     | Orange                                                                                                                                                          | Orange                                                                               |
| Crystal size (mm)                                                          | 0.45 × 0.43 × 0.20                                                                                                                                              | 0.41 × 0.31 × 0.01                                                                   |
| Data collection                                                            |                                                                                                                                                                 |                                                                                      |
| Diffractometer                                                             | Nonius Kappa CCD diffractometer                                                                                                                                 | Rigaku Rapid II curved image plate diffractometer                                    |
| Radiation source                                                           | fine focus X-ray tube                                                                                                                                           | microfocus X-ray tube                                                                |
| Monochromator                                                              | Graphite                                                                                                                                                        | Laterally graded multilayer (Goebel) mirror                                          |
| Scan method                                                                | $\omega$ and $\phi$ scans                                                                                                                                       | $\omega$ scans                                                                       |
| Absorption correction                                                      | multi-scan, <i>SCALEPACK</i> (Otwinowski & Minor, 1997)                                                                                                         | multi-scan, <i>SCALEPACK</i> (Otwinowski & Minor, 1997)                              |
| $T_{\min}, T_{\max}$                                                       | 0.606, 0.892                                                                                                                                                    | 0.300, 0.946                                                                         |
| No. of measured, independent and observed [ $I > 2\sigma(I)$ ] reflections | 37807, 37807, 27588                                                                                                                                             | 50866, 6189, 3633                                                                    |
| $R_{\text{int}}$                                                           | n/a (non-merohedric twin)                                                                                                                                       | 0.162                                                                                |
| $\theta$ values (°)                                                        | $\theta_{\max} = 28.3, \theta_{\min} = 1.8$                                                                                                                     | $\theta_{\max} = 72.8, \theta_{\min} = 5.3$                                          |
| $(\sin \theta/\lambda)_{\max}$ (Å <sup>-1</sup> )                          | 0.667                                                                                                                                                           | 0.619                                                                                |
| Range of $h, k, l$                                                         | $h = -17 \rightarrow 18, k = -22 \rightarrow 22, l = -22 \rightarrow 22$                                                                                        | $h = -27 \rightarrow 27, k = -14 \rightarrow 14, l = -26 \rightarrow 28$             |



| Refinement                                                  |                                                                                  |                                                                                   |
|-------------------------------------------------------------|----------------------------------------------------------------------------------|-----------------------------------------------------------------------------------|
| $R[F^2 > 2\sigma(F^2)], wR(F^2), S$                         | 0.060, 0.175, 1.01                                                               | 0.097, 0.289, 1.04                                                                |
| No. of reflections                                          | 37807                                                                            | 6189                                                                              |
| No. of parameters                                           | 1337                                                                             | 426                                                                               |
| No. of restraints                                           | 1696                                                                             | 0                                                                                 |
|                                                             | $w = 1/[\sigma^2(F_o^2) + (0.0939P)^2 + 4.1876P]$ where $P = (F_o^2 + 2F_c^2)/3$ | $w = 1/[\sigma^2(F_o^2) + (0.1049P)^2 + 30.4873P]$ where $P = (F_o^2 + 2F_c^2)/3$ |
| H-atom treatment                                            | H-atom parameters were constrained                                               | H-atom parameters were constrained                                                |
| $(\Delta/\sigma)_{\max}$                                    | 0.003                                                                            | < 0.001                                                                           |
| $\Delta\rho_{\max}, \Delta\rho_{\min}$ (e Å <sup>-3</sup> ) | 0.59, -0.49                                                                      | 0.68, -1.27                                                                       |

Computer programs: Nonius Collect (Nonius, 1998), *CrystalClear*-SM Expert 2.1 b32 (Rigaku, 2014), *HKL-3000* (Otwinowski & Minor, 1997), *SHELXS97* (Sheldrick, 2008), *SHELXL2014/7* (Sheldrick, 2014), *SHELXLE* Rev714 (Hübschle *et al.*, 2011).

### Cyclic voltammograms

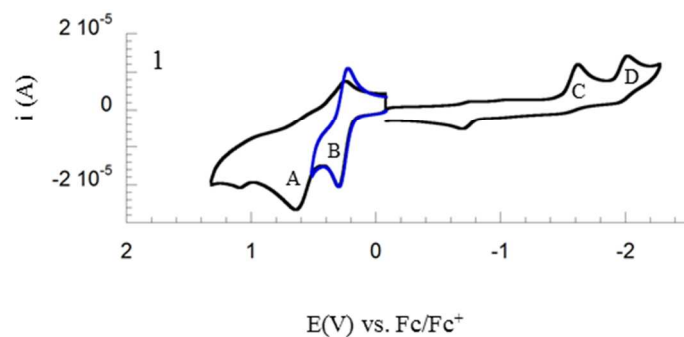

**Figure S8:** Cyclic voltammograms of **1** in 0.1 M MeCN solution of Bu<sub>4</sub>NPF<sub>6</sub> at a scan rate of 0.10 V/s (black trace). Anodic scan of **1** to 0.6 V, showing improved reversibility of **B** (blue trace) at lower potentials.

### Differential pulse voltammogram

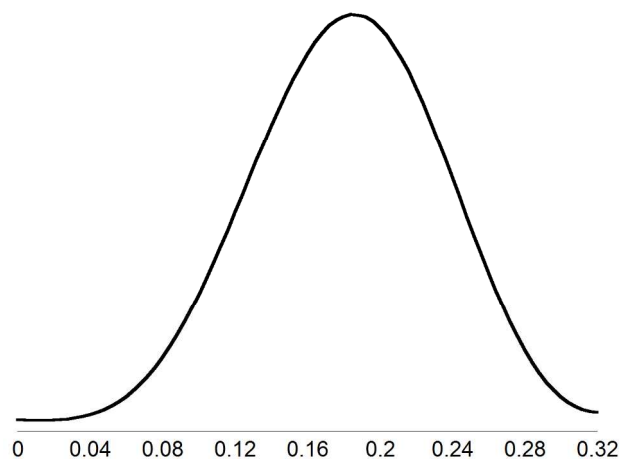

**Figure S9.** Differential pulse voltammogram showing the 1<sup>st</sup> oxidation (NMe<sub>2</sub>-NMe<sub>2</sub>)<sup>+</sup> of **[3](OTf)** in DCM with 0.1M NBu<sub>4</sub>PF<sub>6</sub> under Taube-Richardson conditions (pulse amplitude = 10 mV).

## Computational Details

The geometries of  $[3']^+$ , and  $[4']^+$  in the ground state were fully optimized from the crystal structures reported in this work, using the density functional method B3LYP (Beck's 3 parameter hybrid functional using the Lee-Yang-Parr correlation functional) and employing the LanL2DZ basis sets. The calculation was accomplished by using the Gaussian03 program package.<sup>4</sup>

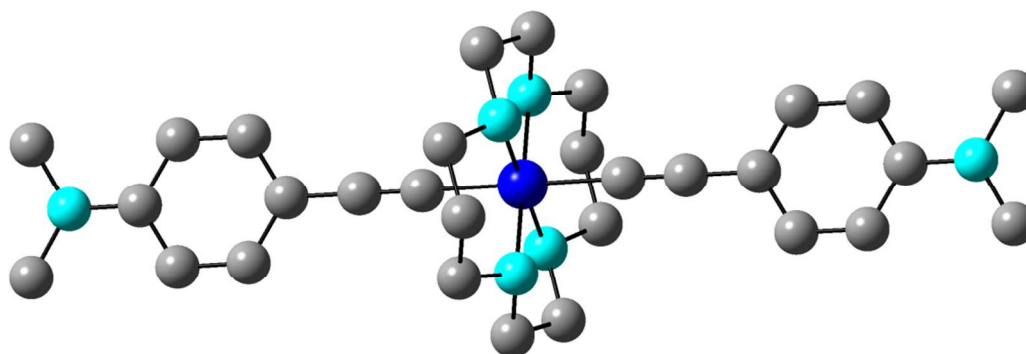

**Figure S10.** Fully optimized structure of  $[3']^+$  using DFT method at the LanL2DZ level.

**Table S2.** Relevant bond length (Å) and angles (deg) computed for  $[3']^+$ .

|        |         |
|--------|---------|
| Co1-N1 | 2.01822 |
| Co1-N2 | 2.01700 |
| Co1-N3 | 2.01822 |
| Co1-N4 | 2.01700 |
| Co1-C1 | 1.95550 |
| C1-C2  | 1.24466 |
| C2-C3  | 1.44008 |
| C3-C4  | 1.41912 |

|           |           |
|-----------|-----------|
| C3-C8     | 1.41894   |
| C4-C5     | 1.39765   |
| C5-C6     | 1.42833   |
| C6-C7     | 1.42831   |
| C7-C8     | 1.39773   |
| C6-N5     | 1.39027   |
| C9-N5     | 1.46832   |
| C10-N5    | 1.46831   |
| C1-Co-C1' | 180.00000 |
| Co1-C1-C2 | 176.24215 |
| C2-C3-C4  | 121.51154 |
| C6-N5-C9  | 120.19868 |

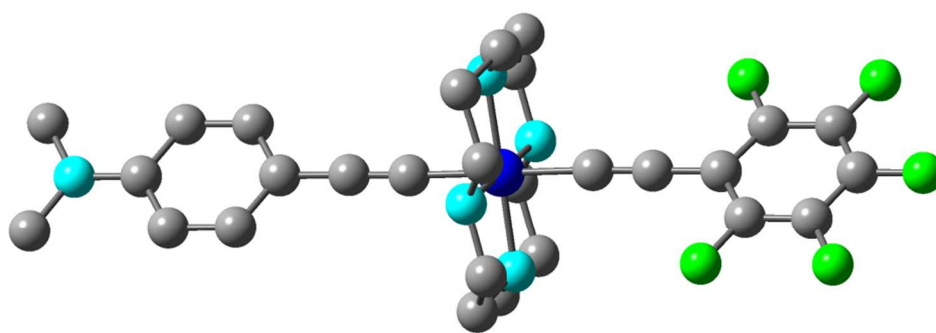

**Figure S11.** Fully optimized structure of  $[4']^+$  using DFT method at the LanL2DZ level.

**Table S3.** Relevant bond length (Å) and angles (deg) computed for  $[4']^+$ .

|         |         |
|---------|---------|
| Co1-N1  | 2.01754 |
| Co1-N2  | 2.01649 |
| Co1-N3  | 2.02140 |
| Co1-N4  | 2.02176 |
| Co1-C1  | 1.95147 |
| C1-C2   | 1.24031 |
| C2-C3   | 1.42788 |
| C3-C4   | 1.41236 |
| C3-C8   | 1.41224 |
| C4-C5   | 1.39727 |
| C5-C6   | 1.40216 |
| C6-C7   | 1.40212 |
| C7-C8   | 1.39733 |
| Co1-C9  | 1.94413 |
| C9-C10  | 1.24401 |
| C10-C11 | 1.43953 |
| C11-C12 | 1.41918 |
| C11-C16 | 1.41924 |
| C12-C13 | 1.39714 |
| C13-C14 | 1.42899 |

|             |           |
|-------------|-----------|
| C14-C15     | 1.42900   |
| C15-C16     | 1.39707   |
| C14-N5      | 1.38868   |
| N5-C17      | 1.46903   |
| N5-C18      | 1.46907   |
| C1-Co-C9    | 179.66673 |
| Co1-C1-C2   | 175.93343 |
| C1-C2-C3    | 179.04337 |
| C2-C3-C4    | 121.93349 |
| Co1-C9-C10  | 175.65246 |
| C9-C10-C11  | 179.01916 |
| C10-C11-C12 | 121.45834 |
| C14-N5-C17  | 120.22733 |

- (1) Y. D. Zhang and J. X. Wen, *Synthesis*, **1990**, 727.  
(2) B. Bosnich, C. K. Poon and M. L. Tobe, *Inorg. Chem.*, **1965**, 4, 1102.  
(3) T. D. Cook, S. N. Natoli, P. E. Fanwick and T. Ren, *Organometallics*, **2015**, 34, 686.  
(4) Nonius (1998). Collect Users Manual, Nonius Delft, The Netherlands.  
(5) Rigaku (2014). CrystalClear-SM Expert 2.1 b32, Rigaku Corp., The Woodlands, Texas, USA.  
(6) Otwinowski Z. & Minor, W., *Methods Enzymol.* **1997**, 276, 307-327  
(7) (a) SHELXTL (Version 6.14) (2000-2003) Bruker Advanced X-ray Solutions, Bruker AXS Inc., Madison, Wisconsin: USA. (b) Sheldrick, G. M., *Acta Cryst.* **2008**, A64, 112-122.  
(8) Sheldrick, G. M., *Acta Cryst.* **2015**, C71, 3-8.; Sheldrick, G. M., University of Göttingen, Germany, 2013.

- (9) SHELXLE Rev656, Rev714, SHELXLE. Hübschle, C. B., Sheldrick, G. M. and Dittrich, B., *J. Appl. Cryst.* **2011**, *44*, 1281-1284.
- (10) Cooper, R. I., Gould, R. O., Parsons, S, Watkin, D. J., *J. Appl. Cryst.* **2002**, *35*, 168-174.
- (11) Farrugia, L. J., *J. Appl. Cryst.* **2012**, *45*, 849-854.
- (12) Frisch, M. J.; Trucks, G. W.; Schlegel, H. B.; Scuseria, G. E.; Robb, M. A.; Cheeseman, J. R.; Montgomery, J. A., Jr.; Vreven, T.; Kudin, K. N.; Burant, J. C.; Millam, J. M.; Iyengar, S. S.; Tomasi, J.; Barone, V.; Mennucci, B.; Cossi, M.; Scalmani, G.; Rega, N.; Petersson, G. A.; Nakatsuji, H.; Hada, M.; Ehara, M.; Toyota, K.; Fukuda, R.; Hasegawa, J.; Ishida, M.; Nakajima, T.; Honda, Y.; Kitao, O.; Nakai, H.; Klene, M.; Li, X.; Knox, J. E.; Hratchian, H. P.; Cross, J. B.; Bakken, V.; Adamo, C.; Jaramillo, J.; Gomperts, R.; Stratmann, R. E.; Yazyev, O.; Austin, A. J.; Cammi, R.; Pomelli, C.; Ochterski, J. W.; Ayala, P. Y.; Morokuma, K.; Voth, G. A.; Salvador, P.; Dannenberg, J. J.; Zakrzewski, V. G.; Dapprich, S.; Daniels, A. D.; Strain, M. C.; Farkas, O.; Malick, D. K.; Rabuck, A. D.; Raghavachari, K.; Foresman, J. B.; Ortiz, J. V.; Cui, Q.; Baboul, A. G.; Clifford, S.; Cioslowski, J.; Stefanov, B. B.; Liu, G.; Liashenko, A.; Piskorz, P.; Komaromi, I.; Martin, R. L.; Fox, D. J.; Keith, T.; Al-Laham, M. A.; Peng, C. Y.; Nanayakkara, A.; Challacombe, M.; Gill, P. M. W.; Johnson, B.; Chen, W.; Wong, M. W.; Gonzalez, C.; Pople, J. A. *Gaussian 03, Revision D.02*, Gaussian, Inc.: Wallingford, CT, 2003..
